# Predator-prey interactions in a warming world: the critical role of cold tolerance

Xuezhen Ge<sup>a,\*</sup>, Cortland K. Griswold<sup>a</sup>, Jonathan A. Newman<sup>b</sup>

<sup>a</sup>*Department of Integrative Biology, University of Guelph, Guelph, N1G  
2W1, Ontario, Canada*

<sup>b</sup>*Department of Biology, Wilfrid Laurier University, Waterloo, N2L  
3C5, Ontario, Canada*

---

## Abstract

Thermal tolerance mismatch within predator-prey systems may have profound effects on species population abundances and geographical distributions. To examine the generalized responses of a predator-prey system to climate change, we construct a biologically detailed stage-structured population dynamic model of interactions between ladybird beetles and aphids. We explore the model's dynamics across the entire feasible parameter space of mean temperature and seasonality. Within this space, we explore different scenarios of predator and prey thermal tolerance mismatch to gain insight into how these thermal sensitivities affect the interacting species' responses to climatic change. Our results indicate a predator's cold tolerance has a larger effect on prey abundance than its heat tolerance. Mismatches between the predator's and prey's thermal tolerances also affect the species' response to climate change. We identify three common patterns of species abundance across the feasible parameter space that relate to the type of thermal tolerance mismatches. Our study highlights the importance of understanding the complex interplay between climate change and species interactions.

---

\*Corresponding author  
Preprint submitted to *Ecological Modelling*

5 *Keywords:* thermal tolerance mismatch, predator-prey, climate change,  
6 stage-structured models, interactions

---

## 7 **1. Introduction**

8 The changing global climate is likely to alter species interactions (Blois  
9 et al., 2013; Alexander et al., 2015). Over the past few decades, progress has  
10 been made in understanding how individual species' physiology, demogra-  
11 phy, and spatial distributions respond to climate change (Chen et al., 2011;  
12 Machekano et al., 2018). However, studies of the effects of climate change on  
13 species interactions are still under studied (Alexander et al., 2015; Gilman,  
14 2017). The direct effect of climate on individual species can affect species  
15 interactions, which can likewise alter individual species' performance under  
16 climate change (Blois et al., 2013; Boukal et al., 2019). It is thus crucial  
17 to understand the complex interplay between climate change and species  
18 interactions.

19 Predation is a fundamental biotic interaction (Bianchi et al., 2006; Glen  
20 and Dickman, 2014). Climate change may modify the characteristics of  
21 predator and prey individually, and this may alter each species' phenology  
22 and potentially cause mismatches in the timing of life history events be-  
23 tween the species. Such phenological mismatches may lead to complex out-  
24 comes and make difficult the task of predicting species' population responses  
25 to climate change (Gilman, 2017; Schmitz and Barton, 2014; Damien and  
26 Tougeron, 2019). Boukal et al. (2019) provided a conceptual framework that  
27 links temperature effects on individual species to species interactions, as well  
28 as outlined how recent advances have revealed the importance of species in-

29 teractions in maintaining ecosystem stability and resilience in the face of  
30 climatic change.

31 Predator and prey may differ in their thermal tolerance limits. For ex-  
32 ample, [Buxton et al. \(2020\)](#) found that two notonectid predators (*Anisops*  
33 *sardea* and *Enithares chinai*) and one copepod predator (*Lovenula falcifera*)  
34 had lower  $CT_{min}$  and  $CT_{max}$  (i.e., were more cold tolerant but less heat toler-  
35 ant) than the three mosquito prey, *Aedes aegypti*, *Anopheles quadriannulatus*  
36 and *Culex pipiens*. [Pintanel et al. \(2021\)](#) quantified the thermal tolerance  
37 mismatch in a predator-prey system comprising dragonfly species and anuran  
38 species and found predators always had higher maximum thermal tolerances  
39 than their prey.

40 Much recent evidence suggests that the thermal tolerance limits of insect  
41 species have profound effects on species population abundance and geograph-  
42 ical distributions as temperature is one of the most important abiotic con-  
43 straints on species' biological functions ([Sunday et al., 2012](#); [Birkett et al.,](#)  
44 [2018](#); [Amundrud and Srivastava, 2020](#)). Different thermal performances be-  
45 tween predator and prey adds uncertainty and complexity when predicting  
46 species population abundance and distribution. [Fig. 1](#) is a conceptual depic-  
47 tion of how thermal tolerance mismatches between interacting species result  
48 in different performance in response to climate change (e.g., wider thermal  
49 breadth of the predator may lead to a stronger predation rate). Despite  
50 increasing attention to the impacts of climate change on predator-prey in-  
51 teractions, few studies have evaluated how thermal tolerance mismatches  
52 between interacting species affect species' response to a changing climate.  
53 Therefore, our goal in this work was to examine the generalized responses of

a predator-prey system to climate change by incorporating different scenarios of predator and prey thermal tolerance mismatches (mainly focusing on horizontal shifts of thermal performance curves).

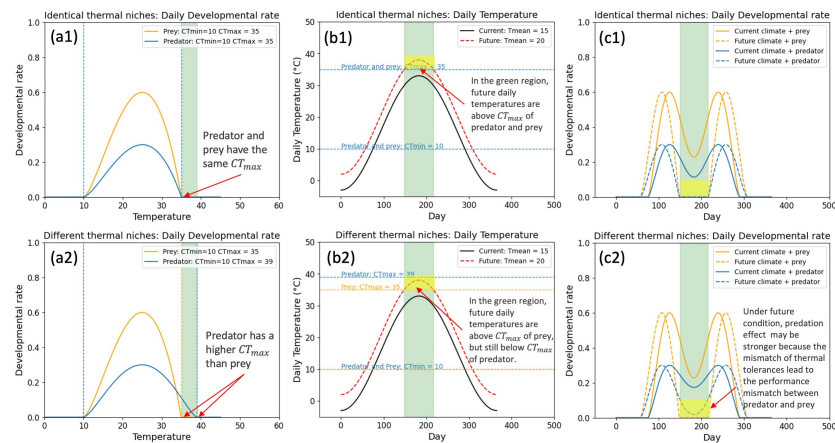

Figure 1: A demonstration of how thermal tolerance mismatches between interacting species result in different performances in response to climate change. (a1) and (a2) show the temperature performance curves for prey and predator's developmental rates when they have identical (a1) or different (a2) thermal niches (i.e., predator is more heat tolerant than the prey). (b1) and (b2) show the interaction between the thermal tolerances and the changing temperatures under climate change (e.g., rising temperature may be suitable for the predator but not suitable for the prey when predator is more heat tolerant than the prey). (c1) and (c2) show the developmental rate curves for predator and prey under current and future climates, which demonstrate that the thermal tolerance mismatch between the interacting species leads to species' different performances in response to climate change.

To achieve our goal, we construct a biologically detailed stage-structured population dynamic model of the interactions between ladybird beetles and aphids. Aphids and ladybirds occur worldwide, with aphids being amongst the most destructive insect pests to cultivated plants and an important vector

of plant pathogens (Ng and Perry, 2004; Dedryver et al., 2010). The response of aphids to global climate change is therefore of broad concern. Ladybird beetles predate aphids and can be a natural regulator of aphid populations. They are also used in biological control practices (Brown, 2004). As ectotherms, aphids and ladybirds are both highly sensitive to ambient temperature. Due to their economic importance, a great deal of life history data are available for these species. Thus, these species constitute a good model system for addressing our research interests. We parameterized the model using experimental data on the responses of developmental, fecundity, mortality and predation rates to temperature. We based these parameter estimates on the cotton aphid (*Aphis gossypii* Glover [Hemiptera: Aphididae]) and ladybird beetle (*Harmonia dimidiata* (Fab.) [Coccinellidae: Coleoptera]), and constructed a mechanistic model of aphid-ladybird population dynamics (See Supplement 1 for the life history of *A. gossypii* and *H. dimidiata*). We analyzed this model for different predator-prey thermal tolerance mismatch scenarios and climate scenarios to gain insight into how such mismatches for interacting species affects their responses to climate change and how climate change affects the population abundance for interacting species. Although our model is based on aphids and ladybirds, it is informative for species with similar interactions, as well as our current state of knowledge of the response of aphids to global warming.

## 2. Material and Methods

In this study, we develop a stage-structured population dynamic model of aphids and ladybirds. Developmental, fecundity, mortality and predation

85 rates for both aphids and ladybirds are functions of temperature (Zamani  
86 et al., 2006; Khan et al., 2015). We use the model to estimate annual aphid  
87 pressure (*AAP*, defined as the accumulation of the daily population abun-  
88 dance) and annual ladybird pressure (*ALP*) for different temperature profiles  
89 and different predators. Note that, for brevity, we will refer *AAP* and *ALP*  
90 as aphid and ladybird population abundances throughout the paper, but we  
91 recognize that they are abundances across the entire year.

## 92 2.1. Predator and prey thermal tolerance mismatch scenarios

93 We used nine hypothetical ladybirds and one aphid to form nine pairs of  
94 interacting species which have all the possible qualitative thermal tolerance  
95 mismatches. The nine hypothetical ladybirds have different critical thermal  
96 minima and maxima. The thermal tolerances of the nine pairs of species are  
97 summarized in Table 1, and illustrated in Fig. 2. AL1 (aphid - ladybird1) is  
98 a base scenario, where the aphid and ladybird beetle have identical thermal  
99 niches. For the next three pairs of species (AL2, AL3 and AL4), ladybird bee-  
100 tles are *more* thermotolerant than the aphids (ladybirds have greater thermal  
101 breadth and either better cold or heat tolerance, or both). For the next three  
102 pairs (AL5, AL6 and AL7), ladybird beetles are *less* thermotolerant than the  
103 aphids (ladybirds have less thermal breadth and poor cold or heat tolerance,  
104 or both). For AL8 and AL9, ladybirds have the same thermal breadth as the  
105 aphid, but their cold and heat tolerances are different.

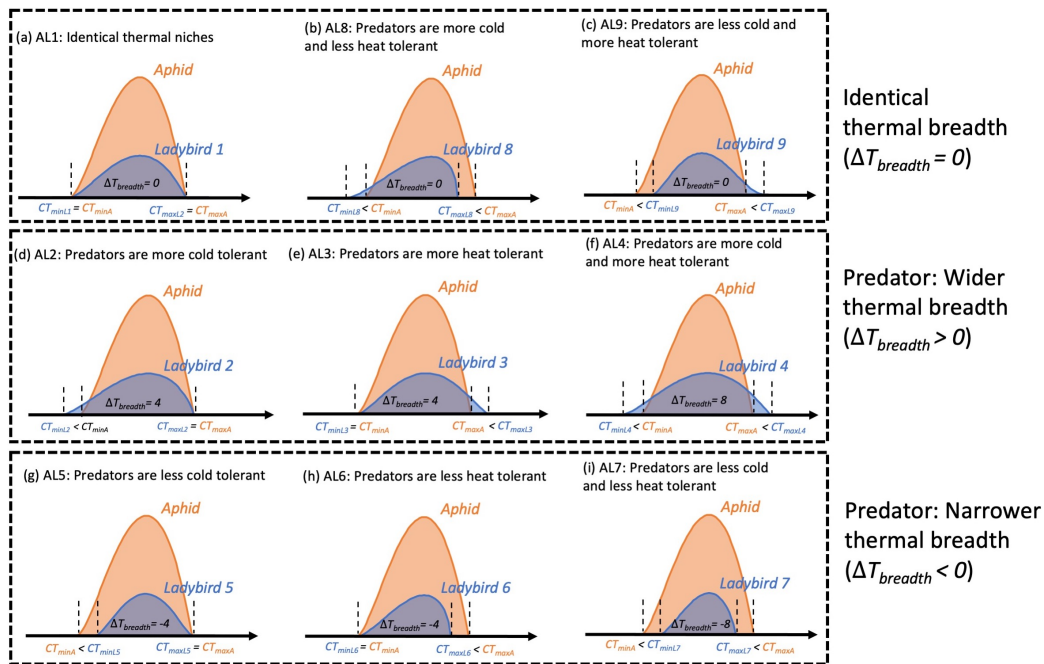

Figure 2: Conceptual sketch of thermal tolerance mismatches for nine pairs of aphid and ladybird beetles. The orange curve represents the thermal performance curve for the aphid, the blue curve represents the thermal performance curve for the ladybird.  $CT_{minA}$ ,  $CT_{maxA}$ ,  $CT_{minL}$  and  $CT_{maxL}$  represent critical thermal minima and maxima for aphid and ladybirds.  $\Delta T_{breadth} = T_{breadthL} - T_{breadthA}$ . A lower maximum thermal performance of ladybirds relative to aphids corresponds to a lower intrinsic developmental rate.

Table 1: Thermal tolerances for the nine pairs of aphid and ladybird beetles.  $CT_{minA}$ ,  $CT_{maxA}$ ,  $CT_{minL}$  and  $CT_{maxL}$  represent critical thermal minimums and maximums for aphid and ladybirds.  $T_{breadthA} = CT_{maxA} - CT_{minA}$ ,  $T_{breadthL} = CT_{maxL} - CT_{minL}$ ,  $\Delta T_{breadth} = T_{breadthL} - T_{breadthA}$ .

∞

| Aphid and ladybird pairs                                          | $CT_{minA}$ | $CT_{maxA}$ | $CT_{minL}$ | $CT_{maxL}$ | $T_{breadthA}$ | $T_{breadthL}$ | $\Delta T_{breadth}$ |
|-------------------------------------------------------------------|-------------|-------------|-------------|-------------|----------------|----------------|----------------------|
| AL1: Identical thermal niches                                     | 10          | 35          | 10          | 35          | 25             | 25             | 0                    |
| AL2: Predators are more cold tolerant                             | 10          | 35          | 6           | 35          | 25             | 29             | 4                    |
| AL3: Predators are more heat tolerant                             | 10          | 35          | 10          | 39          | 25             | 29             | 4                    |
| AL4: Predators are both more cold and more heat tolerant          | 10          | 35          | 6           | 39          | 25             | 33             | 8                    |
| AL5: Predators are less cold tolerant                             | 10          | 35          | 14          | 35          | 25             | 21             | -4                   |
| AL6: Predators are less heat tolerant                             | 10          | 35          | 10          | 31          | 25             | 21             | -4                   |
| AL7: Predators are both less cold and less heat tolerant          | 10          | 35          | 14          | 31          | 25             | 17             | -8                   |
| AL8: Predators are more cold and less heat tolerant than the prey | 10          | 35          | 6           | 31          | 25             | 25             | 0                    |
| AL9: Predators are less cold and more heat tolerant than the prey | 10          | 35          | 14          | 39          | 25             | 25             | 0                    |



## 106 2.2. Model construction

107 Following the traditions of insect predator-prey modelling (see e.g. Xia  
108 et al. (2018)), we constructed a continuous time stage-structured model for  
109 aphid and ladybird population dynamics. We model developmental, birth,  
110 death, and predation rates as temperature dependent. The dynamic model  
111 comprises a set of coupled ordinary differential equations. The Python  
112 code for the model is available at [https://github.com/xuezhenge/population-](https://github.com/xuezhenge/population-dynamic-model)  
113 [dynamic-model](https://github.com/xuezhenge/population-dynamic-model).

### 114 2.2.1. Assumptions and Modelling Choices

- 115 1. We model only the anholocyclic life cycle and asexual reproduction of  
116 aphid.
- 117 2. For each locality, we assume that the aphid and ladybird populations  
118 are closed (e.g., no immigration and emmigration).
- 119 3. We assume the stage-specific temperature-dependent predation rates  
120 of ladybird are the same for all ladybird life stages.
- 121 4. For the aphid, we assume that predation by ladybirds is the only source  
122 of aphid extrinsic mortality. For the ladybird, we assume that ladybird  
123 birth rates depend on aphid capture rates, and that the only source of  
124 extrinsic mortality in our model derives from starvation at low aphid  
125 population sizes. Both aphid and ladybird intrinsic mortality rates are  
126 functions of temperature.
- 127 5. We assume  $CT_{minA}$ ,  $CT_{maxA}$ ,  $CT_{minL}$  and  $CT_{maxL}$  are the critical ther-  
128 mal minima and maxima for aphid and ladybird beetle, beyond which  
129 developmental and predation rates are set to 0, the mortality rates are  
130 maxima.

131 6. Although our model is stage-specific, we assume all the stages share the  
132 same temperature-dependent developmental rate and intrinsic mortal-  
133 ity rate to simplify the analysis.

### 134 2.2.2. General temperature-dependent function

135 We often make use of the same function to model temperature-dependence,  
136 albeit with differing values of the shape parameters. It is therefore convenient  
137 to define the function generally. We used a function presented by [Thornley](#)  
138 [and France \(2007, p. 105, their eqn 4.50\)](#) to model fecundity and development  
139 as functions of temperature.

$$z(T) = \begin{cases} m \frac{(T-CT_{min})^{q_1} (CT_{max}-T)^{q_2}}{(T^*-CT_{min})^{q_1} (CT_{max}-T^*)^{q_2}} & \text{if } CT_{min} \leq T \leq CT_{max} \\ 0 & \text{otherwise} \end{cases}, \quad (1)$$

140 This function is flexible and fits the temperature-dependent traits very  
141 well. [Eq. 1](#) has three shape parameters:  $m$  scales the function by changing  
142 its maximum value, and  $q_1$  and  $q_2$  change the function shape.  $T$  is the air  
143 temperature. The function reaches to its maximum ( $m$ ) at  $T^*$ .  $CT_{min}$  and  
144  $CT_{max}$  are the minimum and maximum temperature thresholds beyond which  
145 fecundity or developmental rate is 0, their values for different species pairs  
146 are provided in [Table 1](#).

147 [Eq. 1](#) reaches its maximum value at

$$T^* = \frac{(q_1 CT_{max} + q_2 CT_{min})}{q_1 + q_2}. \quad (2)$$

148 To focus on the effect of thermal tolerance limits and isolate the effect  
149 of altering thermal performance curve, we fix the value of  $T^*$  to be 25 °C,

150 which is approximately the optimal temperature for the development of the  
151 aphid and ladybird. To ensure  $T^*$  stays constant for all species, we fix the  
152 value of  $q_1$  and solve Eq. 2 for  $q_2$ .

153 We used a piecewise linear function,  $v(T)$ , to fit the experimental intrinsic  
154 mortality data. This function is flexible and has the correct general shape  
155 for describing how mortality rates change with temperature:

$$v(T) = \begin{cases} k_1 T + b_1 & \text{if } CT_{min} \leq T \leq CT_{opt1}, \\ v_{min} & \text{if } CT_{opt1} < T \leq CT_{opt2}, \\ k_2 T + b_2 & \text{if } CT_{opt2} < T \leq CT_{max}, \\ v_{max} & \text{otherwise,} \end{cases} \quad (3)$$

156 Here,  $T$  is the air temperature,  $CT_{opt1}$  and  $CT_{opt2}$  define the temperature  
157 range in which mortality is minimal, which we set to be 20 °C and 30 °C for  
158 all species.  $CT_{min}$  and  $CT_{max}$  are the minimum and maximum temperature  
159 thresholds beyond which mortality rates are maximal (see Table 1).  $k_1$ ,  $b_1$ ,  
160  $k_2$  and  $b_2$  are the parameters which make  $v(CT_{opt1}) = v(CT_{opt2}) = v_{max}$  and  
161  $v(CT_{min}) = v(CT_{max}) = v_{min}$ . We could not find empirical estimates for  
162  $v_{max}$  in the literature. A sensitivity analysis showed that different maximal  
163 mortality rate of aphid ( $v_{maxA}$ ) did not strongly affect the population dy-  
164 namics of aphid and ladybird (Fig. S5), so we somewhat arbitrarily assumed  
165  $v_{maxA} = 0.3$ , which is higher than the maximum mortality rates that were  
166 obtained from experiments. Similarly, we had to guess  $v_{maxL}$  due to insuffi-  
167 cient experimental data. We picked  $v_{maxL} = 0.15$  as ladybirds generally have  
168 a lower mortality rate than aphids. It is not surprising to see larger ladybird's  
169 maximal mortality rate ( $v_{maxL}$ ) drives larger aphid population due to fewer

170 predators (Fig. S6). These values for  $v_{minA}$  and  $v_{minL}$  seem compatible with  
171 the available experimental data (Van Steenis and El-Khawass, 1995; Zamani  
172 et al., 2006; Yu et al., 2013; Mou et al., 2015; Khan et al., 2015, 2016a,b).

### 173 2.2.3. Aphid Submodel

174 Lacking good estimates of aphid overwinter survival, we model only the  
175 anholocyclic life cycle and asexual reproduction. We only keep track of the  
176 apterous adults in the aphid population, and assume that all the nymphs  
177 will develop to be apterous adults. Based on the life stages of *A. gossypii*,  
178 we model five stages, four instar nymphs and apterous adults. A schematic  
179 diagram of the aphid submodel (Fig. 3a) illustrates the dynamic processes of  
180 the model. There are four rate variables: fecundity, development, predation,  
181 and mortality. We know from laboratory experiments that these rates are  
182 all temperature-dependent (Aldyhim and Khalil, 1993; Van Steenis and El-  
183 Khawass, 1995; Kersting et al., 1999; Xia et al., 1999; Satar et al., 2005;  
184 Zamani et al., 2006; Singh and Singh, 2015). We therefore model these rates  
185 as functions of air temperature. The mathematical notations used in this  
186 submodel are summarized in Table S1. All the estimated parameter values for  
187 the aphid are listed in Table S2, which we derived from *A. gossypii* life history  
188 data to get the correct general shape for temperature performance curves.  
189 The shapes of the temperature-dependent fecundity rate, development rates  
190 and mortality rates of different stages of the nine pairs of species are shown  
191 in Fig. S1.

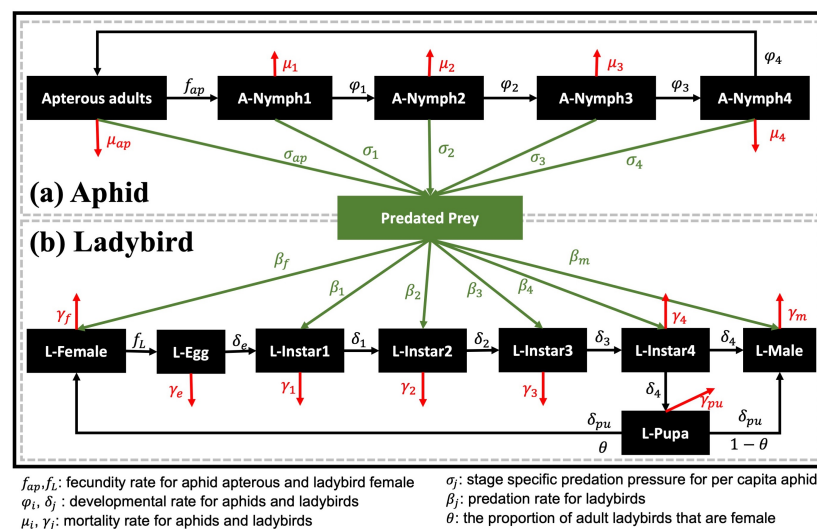

Figure 3: Schematic diagrams of model structure and analysis. (a) and (b) denote the life histories of the aphid and ladybird beetle, respectively. They are connected by predation. The black boxes in (a) and (b) represent different life stages of the two species. The parameters represent development rates, fecundity rates, mortality rates and predation rates (see Table S1 and S3 for the definitions of these parameters.)

## 192 *Fecundity rate of apterous aphid adults*

193 Since we only consider asexual reproduction of apterous adults in our  
194 model, we use the fecundity rate ( $f_{ap}$ ) to denote the total number of nymphs  
195 produced per apterous adult per day. The per capita fecundity rate of apterous  
196 adults is given by Eq. 1 where  $f_{ap}(T) \equiv z(T)$ . At peak densities for *A.*  
197 *gossypii*, the highest density of aphids per leaf is around 200 (Slosser et al.,  
198 2004). We assume a planting density of 20,000 to 70,000 cotton plants per  
199 acre ( $= 4.94$  to  $17.30$  plants  $\text{m}^{-2}$ ) and 30 leaves per plant. From this, we es-  
200 timated the aphid carrying capacity ( $K$ ) to be approximately  $5 \times 10^4$  aphids  
201  $\text{m}^{-2}$ .

## 202 *Developmental rate of nymphs*

203 The four instar stages have similar development times, thus for simplicity  
204 we use the same developmental rate for all instar nymphs ( $\varphi$ ). The per capita  
205 developmental rate of the nymphs is give by Eq. 1 where  $\varphi(T) \equiv z(T)$  (see  
206 Table S2 for parameter values).

## 207 *Mortality rate of apterous adults and nymphs*

208 In the field, aphids experience both intrinsic and extrinsic mortality. In-  
209 trinsic mortality is assumed to be the result of biological aging, which can  
210 be estimated with the experimental data obtained in the lab with *ad libitum*  
211 food. However, extrinsic mortality, which results from environmental haz-  
212 ards and natural enemies, is exceedingly difficult to estimate experimentally.  
213 We assumed that the only source of extrinsic mortality in our model derives  
214 from ladybird beetle predation. The mortality rates of apterous adults and  
215 nymphs that we used in our model represent the per capita daily intrinsic

mortality. The per capita mortality rate of apterous adults is given by Eq. 3 where  $\mu_{ap}(T) \equiv v(T)$ . For simplicity, we assumed nymphs and apterous adults have the same intrinsic mortality rates, i.e.,  $\mu_{ny}(T) \equiv \mu_{ap}(T)$  (see Table S2 for parameter values).

#### *Predation rates on aphid life stages*

We found no empirical evidence suggesting that the ladybird has a preference for a specific aphid developmental stage so we assume that the ladybird beetle predate each stage of the aphid in proportion to its relative abundance in the total aphid population. Let  $A_i$  be the stage-specific aphid local population size, and let  $A_{den}$  be the total aphid population size, given by,

$$A_{den} = \sum A_i; i \in \{1, 2, 3, 4, ap\}. \quad (4)$$

Then, let  $\alpha_i$  be the fraction of each stage in the total aphid population, given by,

$$\alpha_i = \frac{A_i}{A_{den}}. \quad (5)$$

Finally, let  $P$  be the total number of aphids captured by the ladybird population per day (see Eq. 14). Therefore the number of stage specific predated aphids ( $P_i$ ) and the stage specific predation pressure for per capita aphid ( $\sigma_i$ , i.e., probability of each aphid being predated by ladybirds) are given by,

$$P_i = \alpha_i P, \quad (6)$$

$$\sigma_i = \frac{P_i}{A_i} = \frac{\alpha_i P}{\alpha_i A_{den}} = \frac{P}{A_{den}}, \quad (7)$$

again, where  $i = 1, \dots, 4$ ,  $ap$  denote the four aphid nymphal instars and the apterous adults.  $P_i$  represents the number of stage-specific aphids captured by the ladybird population per day and is a function of the per capita prey capture rate and the total population size of the ladybird beetles, as explained in the ladybird submodel section below (section 2.2.4, Eq. 14). Eq. 7 indicates that the predation pressure from ladybirds ( $\sigma_i$ ) is the same for each life stage of aphids based on our assumption that the ladybird beetle predaes each stage of the aphid in accordance with its relative abundance in the total aphid population.

#### Aphid submodel state equations

The rates of change of the population of the various stages of aphid's life history are modelled by the following coupled ordinary differential equations:

$$\frac{dA_1}{dt} = f_{ap} \left( 1 - \frac{A_{den}}{K} \right) A_{ap} - (\mu_{ny} A_1 + \sigma_1 A_1 + \varphi A_1); \quad (8)$$

$$\frac{dA_i}{dt} = \varphi A_{i-1} - (\mu_{ny} A_i + \sigma_i A_i + \varphi A_i); \quad i = 2, 3, 4; \quad (9)$$

$$\frac{dA_{ap}}{dt} = \varphi A_4 - (\mu_{ap} A_{ap} + \sigma_{ap} A_{ap}). \quad (10)$$

#### 2.2.4. Ladybird beetle submodel

There are eight state variables in the submodel of the ladybird, which corresponds to its life stage, including egg, four instar larvae, pupa, female and male adults. The dynamic process of the submodel is shown schematically in Fig. 3b. We consider four rate variables: fecundity, development, mortality, and predation. Since we assume that the ladybird beetle feeds only on the aphids, the number of captured aphids per ladybird per day (per capita predation rate) affects the ladybird's fecundity and developmental rates. The



mathematical notation used throughout the remainder of this submodel is shown in Table S3 and all the estimated parameter values for the nine ladybird beetles are listed in Table S4. All of these rate variables depend on temperature. Laboratory experiments of *Harmonia dimidiata* under various temperature conditions provided the life tables we used for estimating the parameters for the rate variables (Khan et al., 2015, 2016a,b; Sharma et al., 2017).

#### Predation rate

Except for the egg and pupa, all the other stages of the ladybird can predate aphids. The predation rate for different stages denotes the number of aphids eaten by per ladybird, per day. We assume that the ladybird's predation rate depends on both aphid density and ambient air temperature.

*Predation rate as a function of aphid density at optimal temperatures.* Previous empirical studies indicated that a Type II functional response is common in coccinellids for all life stages of the ladybird (Zarghami et al., 2016; Sharma et al., 2017). We used Holling's (1959) Type II functional response to describe the relationship between the number of consumed prey and the prey density. Let  $\beta(A_{den}, T_{opt})$  be the predation rate per ladybird beetle as a function of prey density ( $A_{den}$ ) at the optimal temperature ( $T_{opt}$ ), and  $\beta(A_{den}^*, T_{opt})$  be the maximum intake rate at maximal aphid density ( $A_{den}^*$ ), then,

$$\beta_j(A_{den}, T_{opt}) = \frac{a_j A_{den}}{(1 + a_j h_j A_{den})}; j = 1, \dots, 4, f, m, \quad (11)$$

$$\beta_j(A_{den}^*, T_{opt}) = 1/h_j, \quad (12)$$

where in Eq. 11  $a_j$  and  $h_j$  denote predator's searching rate and handling time, respectively (Holling, 1959). Previous laboratory experiments have estimated

the effect of aphid density on predation rates for different life stages of the ladybird (Agarwala et al., 2009; Sharma et al., 2017), thus the values of  $a_j$  and  $h_j$  were estimated from density-dependent predation data at the optimal temperature  $T_{opt}$ .

*Predation rate as a function of temperature at maximal aphid density.* Laboratory experiments show that ladybird predation rates are also temperature-dependent (Yu et al., 2013; Khan et al., 2016a,b). Khan et al. (2016a) found that the relationship between predation rates of different stages of *H. dimidiata* and various temperatures are similar to each other, so we used a single temperature-dependent predation rate function for all life stages of ladybirds. Let  $g(A_{den}^*, T)$  be the temperature-dependent predation rate at prey saturation ( $A_{den}^*$ ), which is give by the general temperature dependence function (Eq. 1).

*Predation rate as a function of both aphid density and temperature.* Let  $\beta(A_{den}, T)$  be the predation rate as a function of both density and temperature:

$$\beta_j(A_{den}, T) = \beta_j(A_{den}, T_{opt})g(A_{den}^*, T), \quad (13)$$

where  $\beta(A_{den}, T_{opt})$  is given by Eq. 11.

The total rate of prey consumption by the predator population ( $P$ ) can then be given by the following equation:

$$P = \sum \beta_j(A_{den}, T)H_j; \quad j \in \{1, 2, 3, 4, f, m\}. \quad (14)$$

*Fecundity rate of female ladybirds*

The fecundity rate ( $f_L$ ) of female ladybirds represents the number of eggs produced per female per day, which depends on the females' predation rate.

297 The more prey consumed, the more energy the predator can allocate for  
 298 reproduction. The predator’s numerical response ( $Q_p$ ; also called the ‘trans-  
 299 formation rate’) is the mean number of aphids a ladybird needs to consume to  
 300 reproduce a single egg. The fecundity rate is given by the following function:

$$f_L(T) = \begin{cases} \beta_f(A_{den}, T) / Q_p & \text{if } CT_{minL} \leq T \leq CT_{maxL} \\ 0 & \text{otherwise} \end{cases}, \quad (15)$$

301 where  $\beta_f(A_{den}, T)$  is given by Eq. 13. We conducted a sensitivity analysis  
 302 for  $Q_p$ , which shows that annual aphid population and persistent times are  
 303 sensitive to the choice of this parameter value when temperatures are warmer  
 304 and relatively constant throughout the year (Fig. S3d1-d4). However, there  
 305 are no sufficient data to estimate the temperature-dependent  $Q_p$ . For sim-  
 306 plicity, we assume  $Q_p$  to be a constant value 100 aphids per ladybird, which  
 307 is a rough guess based on Yu et al.’s (2013) laboratory experiment.

### 308 *Stage-Specific Developmental rates*

309 We assume that developmental rates depend on both the ambient air  
 310 temperature and on the predation success of each specific ladybird life stage.

311 *Temperature-dependent development rates for egg and pupa.* The develop-  
 312 mental rates of egg ( $\delta_e$ ) and pupa ( $\delta_p$ ) are temperature-dependent and as-  
 313 summed to be the same, they are given by Eq. 1 where  $\delta_e(T) \equiv \delta_p(T) \equiv z(T)$   
 314 (see Table S4 for parameter values).

315 *Temperature-dependent developmental rates for larvae.*

316 *Temperature-dependent developmental rates at prey saturation.* The de-  
 317 velopmental rates of larvae ( $\delta_j$ ) also depend on the stage-specific predation

318 rates. The more prey consumed, the more energy the predator can use to  
 319 support its development. We assume that the developmental rate for the  
 320 various instars estimated from laboratory data represents the temperature-  
 321 dependent developmental rate at prey saturation,  $\delta_j(A_{den}^*, T)$ , given by Eq. 1  
 322 where  $\delta_j(A_{den}^*, T) \equiv z(T)$  ( $j = 1, 2, 3, 4$ ) (see Table S4 for parameter val-  
 323 ues). The values of temperature-dependent developmental rates for larvae  
 324 are assumed to be the same as for the egg and pupa.

325 *Index that scales temperature-dependency and prey saturation.* Recall,  
 326  $\beta_j(A_{den}^*, T_{opt})$  is the maximum prey intake rate (see Eq. 12) and  $\beta_j(A_{den}, T)$ ,  
 327 given by Eq. 13, is the aphid-density and temperature-dependent preda-  
 328 tion rate. So, we use an index ( $\eta$ ) that ranges from 0 to 1 and scales the  
 329 temperature-dependent and prey saturated predation rate by the rate of  
 330 prey-captured relative to the maximum prey-capture rate ( $1/h_j$ ), given by:

$$\eta_j(A_{den}, T) = \frac{\beta_j(A_{den}, T)}{\beta_j(A_{den}^*, T_{opt})}. \quad (16)$$

331 *Development rates as a function of both prey saturation and tempera-*  
 332 *ture.* Next, let  $\delta_j(A_{den}, T)$  be the prey density-dependent and temperature-  
 333 dependent development rate of larvae, given by:

$$\delta_j(A_{den}, T) = \delta_j(A_{den}^*, T)\eta_j(A_{den}, T). \quad (17)$$

334 *Mortality rate of various stages*

335 We assume that the only source of extrinsic mortality in our model derives  
 336 from starvation due to low aphid densities. The mortality rate of the ladybird  
 337 ( $\gamma_j$ ) denotes the daily *intrinsic* mortality. The per capita mortality rate of  
 338 different stages is given by Eq. 3 where  $\gamma_j(T) \equiv v_i(T)$  (see Table S4 for

parameter values),  $j = \epsilon, 1, \dots, 4, p, f, m$  denote all the stages of the ladybird,  
and their mortality rates are assumed to be same.

### Ladybird submodel state equations

The rates of change of the population of the various developmental stages  
of *H. dimidiata* were modelled by the following coupled ordinary differential  
equations:

$$\frac{dL_{\epsilon}}{dt} = f_L L_f - (\gamma_{\epsilon} + \delta_{\epsilon}) L_{\epsilon}; \quad (18)$$

$$\frac{dL_1}{dt} = \delta_{\epsilon} L_{\epsilon} - (\gamma_1 + \delta_1) L_1; \quad (19)$$

$$\frac{dL_j}{dt} = \delta_{j-1} L_{j-1} - (\gamma_j + \delta_j) L_j, \quad j = 2, 3, 4; \quad (20)$$

$$\frac{dL_{pu}}{dt} = \delta_4 L_4 - (\gamma_{pu} + \delta_{pu}) L_{pu}; \quad (21)$$

$$\frac{dL_f}{dt} = \theta \delta_{pu} L_{pu} - (\gamma_f) L_f; \quad (22)$$

$$\frac{dL_m}{dt} = (1 - \theta) \delta_{pu} L_{pu} - (\gamma_m) L_m; \quad (23)$$

where  $\theta$  represents the proportion of adult ladybirds that are females, which  
we assume is 0.5 (Farhadi et al., 2011).

### 2.3. Temperature profiles

For simplicity, we use a cosine function of daily mean temperature to  
generate various temperature profiles (Eq. 24). In Eq. 24,  $s$  and  $\bar{T}$  represent  
the amplitude and vertical shift respectively, and  $t$  denotes time (day).  $s$   
represents the ‘seasonality’ of daily temperature, which is defined as half of  
the difference between minimum daily temperature ( $T_{yearmin}$ ) and maximum  
daily temperature ( $T_{yearmax}$ ) in a year (Eq. 25).  $\bar{T}$  represents the yearly mean  
temperature (Eq. 26).

$$T_t = -s \cos\left(\frac{2\pi t}{365}\right) + \bar{T}, \quad (24)$$

$$s = (T_{yearmin} + T_{yearmax})/2, \quad (25)$$

$$\bar{T} = \frac{\int_1^{365} T_t dt}{365}. \quad (26)$$

To obtain the feasible range of the two temperature metrics, seasonality ( $s$ ) and yearly mean temperature ( $\bar{T}$ ), we calculate the local temperature metrics in 2020 and 2080 using the daily temperature data at  $1^\circ \times 1^\circ$  grid resolution. We downloaded the hourly 2-meter temperature in 2020 from ERA5 (<https://www.ecmwf.int/en/forecasts/datasets/reanalysis-datasets/era5>) and the daily temperature projections from the Coupled Model Intercomparison Project Phase 6 (CMIP6) (<https://esgf-node.llnl.gov/search/cmip6/>). ERA5 shows the hourly data of a global climate reanalysis from 1979 to the present (documentation is available at <https://confluence.ecmwf.int/display/CKB/ERA5%3A+data+documentation>), which combines the model data with global climatic observations into to globally consistent dataset (Hersbach et al., 2018). CMIP6 includes more than 50 Global Circulation Models (GCMs), which are able to hindcast, as well as project climate for the next 100-200 years over the entire world. A set of emission scenarios driven by different socioeconomic assumptions, which are called “Shared Socioeconomic Pathways” (SSPs) has been developed to model the climate change outcomes. For the daily temperature data in 2020, we selected one of the GCMs (CNRM-CM6-1, France) which has a relatively higher spatial resolution and the highest emissions scenario (SSP5-8.5) for the temperature projections. We interpolated all the temperature data to a

377  $1^\circ \times 1^\circ$  resolution by using the Climate Data Operator (CDO; Schulzweida,  
378 2019), then we calculated the seasonality and mean temperature (based on  
379 their definitions) for each grid cell in 2020 and 2080.

380 The bivariate plots (Fig. 4) of  $\bar{T}$  and  $s$  present the feasible global param-  
381 eter space in 2020 and 2080. We treat the feasible parameter space in 2020 as  
382 the possible combinations of mean temperature and seasonality under cur-  
383 rent climate condition (Fig. 4a). Based on Fig. 4b, we see that the mean  
384 temperature in most regions will increase, while the seasonality may increase  
385 or decrease under future climate conditions. Note that the projections for  
386 2080 suggest that we will see combinations of mean annual temperature and  
387 seasonality that are not currently present anywhere on the earth’s land sur-  
388 faces (Fig. 4a). To simulate different climate change scenarios, we alter  $\bar{T}$   
389 and  $s$  by adding  $\Delta\bar{T}$  (0, 2, or 4) and  $\Delta s$  (-4, 0, or 4) across the entire pa-  
390 rameter space (Fig. 4a), which generates nine different climate scenarios (one  
391 current climate scenario and eight future climate scenarios) (Fig. 5). We use  
392 these climate scenarios to study the role of biotic interactions in determining  
393 species population abundance under climate change.

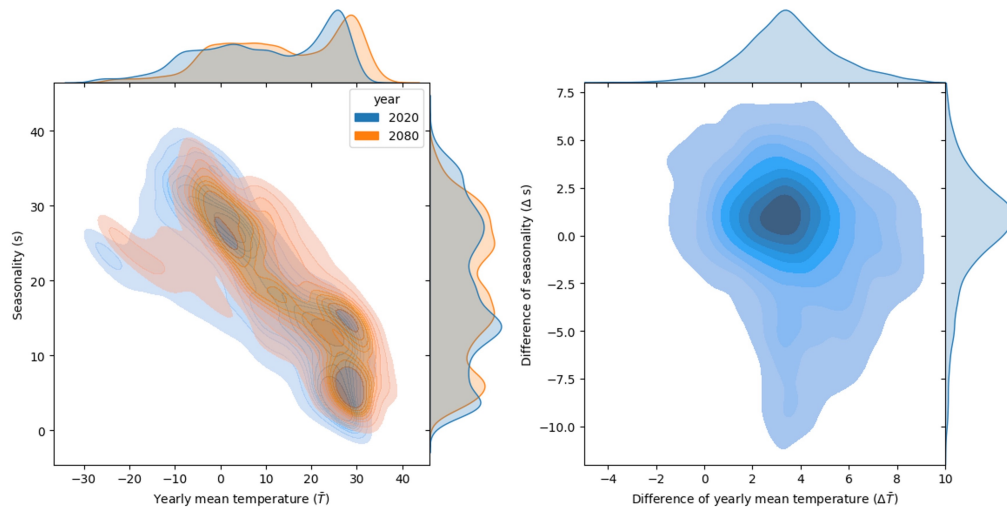

Figure 4: Feasible parameter spaces of yearly mean temperature ( $\bar{T}$ ) and seasonality ( $s$ ) in 2020 and 2080. We calculated  $\bar{T}$  and  $s$  for all the grid cells across the entire land area ( $1^\circ \times 1^\circ$  resolution) in 2020 and 2080 and plot the bivariate distributions (a) for  $\bar{T}$  and  $s$  using kernel density estimation method. The univariate marginal distributions are also added along the x and y axes. (b) shows the bivariate distributions for the differences in  $\bar{T}$  and  $s$  under climate change.



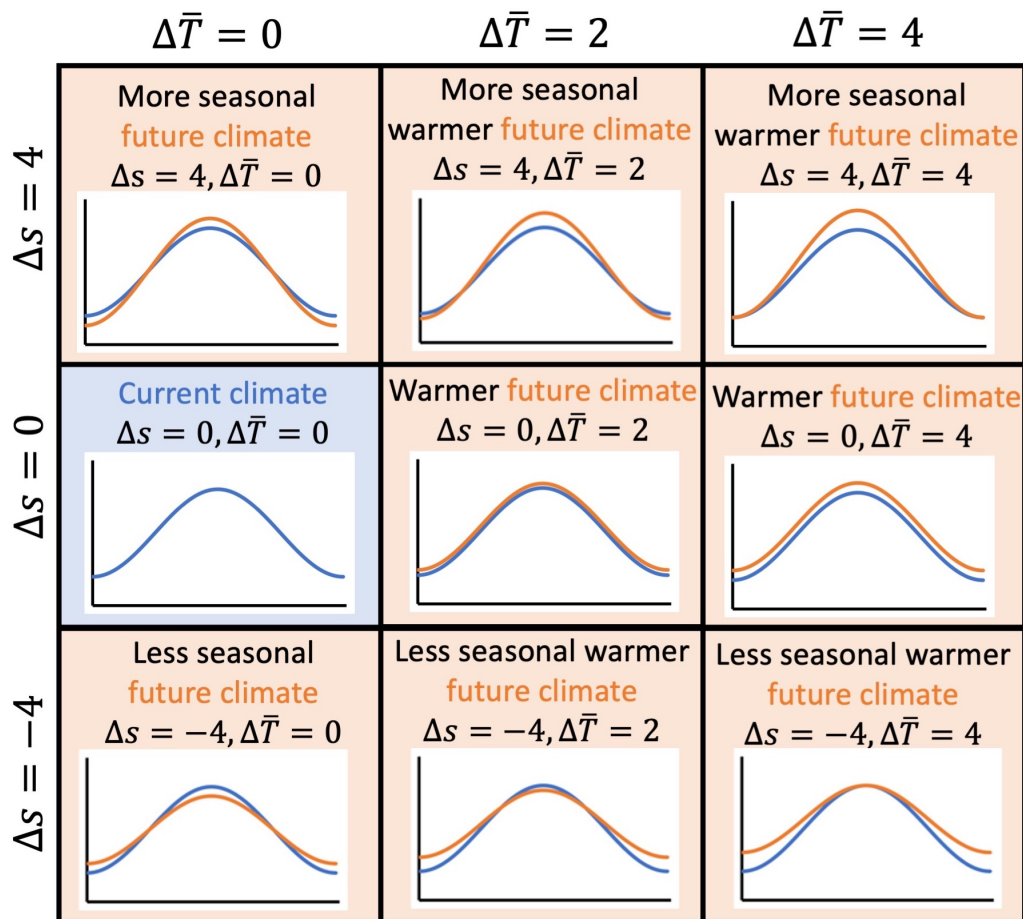

Figure 5: Conceptual diagrams for the nine climate scenarios. The eight future scenarios (with orange background) were generated by altering the yearly mean temperature ( $\bar{T}$ ) and seasonality ( $s$ ).  $\Delta\bar{T}$  and  $\Delta s$  represent the difference in  $\bar{T}$  and  $s$  between different climate conditions (current and future).

## 394 2.4. Sensitivity analysis

395 To assess the robustness of our model and support the estimations of the  
 396 parameters which lack of experimental data, we conducted a sensitivity anal-  
 397 ysis (SA) to evaluate the sensitivity of aphid and ladybird population growth,  
 398 to changes in the aphid’s carrying capacity ( $K$ ), the maximum intrinsic mor-  
 399 tality rates for aphid ( $v_{maxA}$ ) and ladybird ( $v_{maxL}$ ), ladybird transformation  
 400 rate ( $Q_p$ ), and the ratio of aphid’s initial abundance to the ladybird’s initial  
 401 abundance ( $R_{initial}$ ).

402 For the purposes of the SA, we picked four points in each region of the  
 403 parameter space. Each point have different temperature metrics ( $\bar{T}$  and  $s$ ).  
 404 We used Eq. 24 to model the daily mean temperatures throughout a year,  
 405 which represent four temperature ‘profiles’ which result in different popu-  
 406 lation abundance. The temperature metric values for the four temperature  
 407 ‘profiles’ and the simulations of these temperature ‘profiles’ are shown in Fig.  
 408 S2a1-d1.

409 The SA results provide guidance for uncertainty in these parameters. The  
 410 results of the sensitivity analysis are shown in Fig. S2–S4. Except for  $R_{initial}$ ,  
 411 our model results are not strongly affected by changing these parameters.  
 412 The results for the  $R_{initial}$  SA suggest the results fall into three regions. For  
 413 low values of  $R_{initial}$  (fewer aphids relative to ladybirds), ladybirds decimate  
 414 the aphid population and then die out themselves from lack of prey. For  
 415 high values of  $R_{initial}$  (fewer predators relative to prey), rapid aphid repro-  
 416 duction allows the aphid population to ‘escape regulation’ by the predator  
 417 (Fig. S4) and thereafter are *regulated by their carrying capacity* ( $K$ ). These  
 418 two solution spaces are uninteresting as our focus was on the importance of

the predator-prey interaction, which is largely irrelevant in these regions of parameter space. For intermediate values of  $R_{initial}$ , prey populations are mostly *regulated by the predators*. The exact ratios that define the boundaries of these three regions of the solution space depend on the particular values of  $\bar{T}$  and  $s$ . As our focus was on the predator-prey interaction under climate change, we choose an intermediate value of  $R_{initial}$  for the main simulations for this study. Note as well that the results are more sensitive to  $v_{maxL}$  than  $v_{maxA}$  (Fig. S5 and S6). Among the different climate conditions, species that live in warmer less seasonal climate are more sensitive to these two parameters.

## 2.5. Model analysis

In the feasible parameter space under current climate (Fig. 4a), we uniformly sampled 290 combinations of the two temperature metrics ( $\bar{T}$  and  $s$ ). Each sampled combination of  $\bar{T}$  and  $s$  determine the daily temperatures throughout of a year as defined by Eq. 24.

Each simulation began with  $1 \times 10^5$  aphids and 500 ladybird beetles (per  $100 \text{ m}^2$ , split equally among all stages;  $R_{initial} = 200$ ) introduced separately on the dates for which temperatures were ‘warm enough’ ( $T > CT_{min}$ ) to support aphids’ and ladybird beetles’ positive growth. If predators are more cold tolerant than prey, we do not introduce ladybirds until the temperatures reach to aphid’s lower temperature threshold. Accordingly, predators are less cold tolerant than prey, we introduce the aphids ahead of ladybirds. This approach may be biologically unrealistic. Phenological mismatches will happen under climate change (see e.g., Visser and Gienapp, 2019) and this is an import impact of climate change. However, as our focus was on the

444 predator-prey interactions *per se*, we chose an approach that eliminated such  
 445 mismatches, and assumed ladybirds time emergence when positive growth is  
 446 supported. Each simulation was terminated once the aphid and ladybird's  
 447 daily population abundance were both  $< 1$ , or when the end of the simulation  
 448 year was reached.

449 For each pair of interacting species, we ran the simulations for all the tem-  
 450 perature profiles under nine different climate scenarios (Fig. 5) and obtained  
 451 the aphid and ladybird population abundances ( $AAP$  and  $ALP$ ) across the  
 452 feasible parameter space under different climate scenarios. Then, we com-  
 453 pared species abundances under climate change among the nine pairs of  
 454 species which have different thermal tolerances, to gain insight into the gen-  
 455 eralized responses of a predator-prey system to climate change.

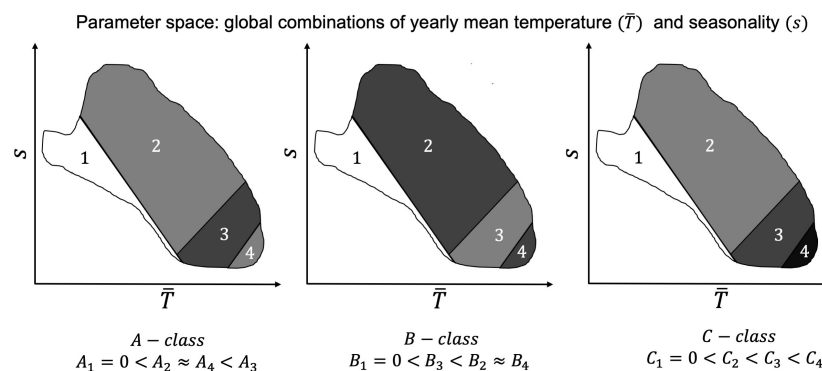

Figure 6: Result classes in parameter space. The parameter space represents all the possible combinations of mean temperature ( $\bar{T}$ ) and seasonality ( $s$ ). In the  $A_1$ ,  $B_1$ ,  $C_1$ -regions, the annual abundances is 0. This region of parameter space is too cold for persistence. Note that the region 4 is not always present in  $A$ -Class results. The exact boundaries between each region in each class depend on the particular climate scenario and the relationships among the critical temperature thresholds. The ordinal patterns are the defining feature.

### 3. Results

#### 3.1. Result classes

Heatmaps of abundance generally exhibit three or four distinct regions. The *relative* magnitudes of abundances in these four regions fall into one of three classes, which we denote as ‘A-Class’, ‘B-Class’ and ‘C-Class’. These are illustrated in Fig. 6. The location of the regional boundaries change in different heatmaps, but the magnitude of values in different regions are roughly consistent for each class. In the A-Class, the relative magnitudes are  $A_1 = 0 < A_2 \approx A_4 < A_3$ . In the B-Class, the relative magnitudes are  $B_1 = 0 < B_3 < B_2 \approx B_4$ . In the ‘C-Class, the relative magnitudes are  $C_1 = 0 < C_2 < C_3 < C_4$ . Note further, it is helpful to link these regions in terms of combinations of  $\bar{T}$  and  $s$ . For example, region 3 ( $A_3$ ,  $B_3$  and  $C_3$ ) corresponds to warmer less seasonal regions, and there can be a qualitative shift in species abundance moving from A-class to B-class to C-class.

#### 3.2. Identical thermal niches (AL1: base case)

Fig. 7a shows *AAP* across the feasible parameter space when prey and predator have identical thermal niches for predators and prey. These are A-Class results. The largest *AAP* values occur in the  $A_3$ -region (see Fig. 6). We see that the  $A_3$ -region of parameter space increases as the climate becomes warmer (larger values of  $\Delta\bar{T}$ ) and less seasonal (smaller values of  $\Delta s$ ). The  $A_3$ -region expands towards the colder, less seasonal regions. This makes sense intuitively since this area of the parameter space is becoming more similar to the  $A_3$ -region under the current climate (Fig. 7a4). In Figures 7a2 and 7a3, we see the appearance of the  $A_4$ -region. Here, the warmest and

480 least seasonal region of the parameter space is becoming too warm for the  
 481 aphids (note the change of color from green to blue). Notice as well that the  
 482 size of the  $A_1$ -region decreases as the the climate becomes warmer (larger  
 483 values of  $\Delta\bar{T}$ ) and increases as the climate becomes more seasonal (larger  
 484 values of  $\Delta s$ ). As the climate warms, more of the region that was formerly  
 485 too cold for aphid persistence ( $A_1$ -region) becomes suitable. Solutions along  
 486 the  $A_1$ - $A_2$  boundary become unsuitable for the aphids ( $A_1$ -region) as the  
 487 climate becomes less seasonal (lower  $\Delta s$ ). In other words, conditions along  
 488 this boundary are becoming ‘more constantly cold’ and hence unsuitable for  
 489 aphid development.

490 [Fig. 7b](#) shows the same information for the ladybird abundance ( $ALP$ ).  
 491 It shows the same pattern as the  $AAP$  results and, not surprisingly,  $ALP$   
 492 is maximal when  $AAP$  is maximal because there are more prey available to  
 493 fuel ladybird population growth.

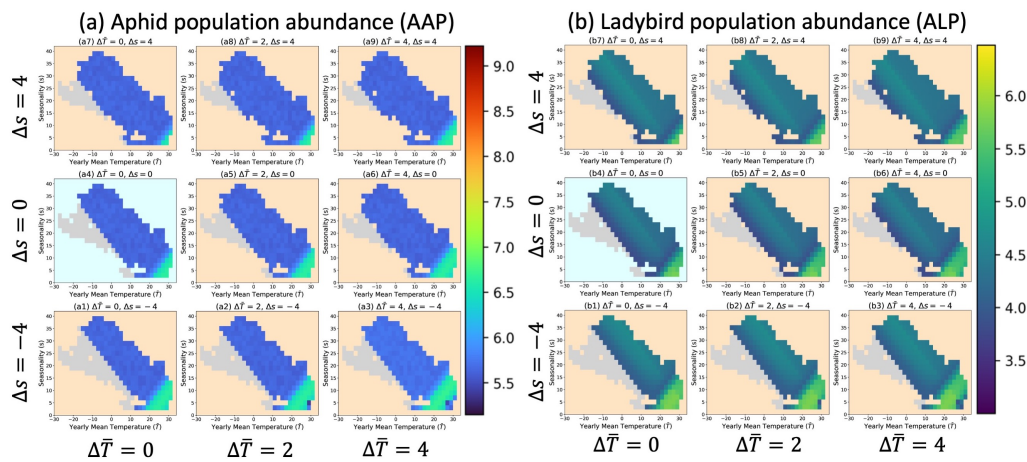

Figure 7: Heatmaps in parameter spaces for aphid and ladybird population abundance under different climate scenarios (*AL1: identical thermal niches, A-Class*). The left nine heatmaps (a) represent the patterns for aphid abundance. The right nine heatmaps (b) represent the patterns for ladybird abundance. Colored region represents the global combinations for mean temperature and seasonality. The points with light grey color indicate that climates are unsuitable for the prey or predator. The heatmap with light blue background represents the abundance pattern under current climate, the rest heatmaps with light orange backgrounds represent the abundance patterns under different future climates.

### 494 3.3. *Predators have wider thermal niche breadths than the prey*

495 *Predators are more cold tolerant* (AL2). The heatmaps (Fig. S7) show the  
496 same general patterns (A-Class) as the base case (AL1, Fig. 7) except that  
497 prey and predators are less abundant than in the base case. More cold toler-  
498 ant predators are, *ceterius parabis*, better able to control the prey. For more  
499 detailed analyses of this and the following species pairs, see the supplemental  
500 information.

501 *Predators are more heat tolerant* (AL3). Fig. S8) again shows the same  
502 general pattern (A-Class) as the base case (AL1, Fig. 7), but the population  
503 abundance for both species are slightly smaller than AL1, especially in  $A_3$   
504 and  $A_4$  regions.

505 *Predators are more heat and more cold tolerant* (AL4). Heatmaps for AL4  
506 (Fig. S9) show a very similar pattern to the base case (Fig. 7a) as well as the  
507 AL2 and AL3. The prey abundance is more similar to AL3 than the other  
508 two pairs.

### 509 3.4. *Predators have a narrower thermal niche breadth*

510 *Predators are less cold tolerant* (AL5). We see a somewhat different pattern  
511 (Fig. 8) than we see in the base case (Fig. 7) or when predators have a wider  
512 thermal niche than the prey (AL2–AL4). Here, the results are now of the B-  
513 Class (see Fig. 6). Unlike previous pairs which have much higher population  
514 abundance in  $A_3$ -regions, predators and prey are less abundant in the  $B_3$ -  
515 regions than  $B_2$ -regions. Also, the  $B_3$ -regions are larger under warmer less  
516 seasonal climate conditions. The other obvious difference with the previous  
517 pairs is the much greater aphid abundance in the  $B_2$ -region compared with



the  $A_2$ -regions in those cases. With a narrower thermal niche breadth, the predator does worse, *ceterius parabis*, and so prey are less well controlled. Nevertheless, greater prey abundance leads to greater predator abundance. The predator abundance differences between  $B_2$  and  $B_3$  regions are not as large as those for the prey abundance.

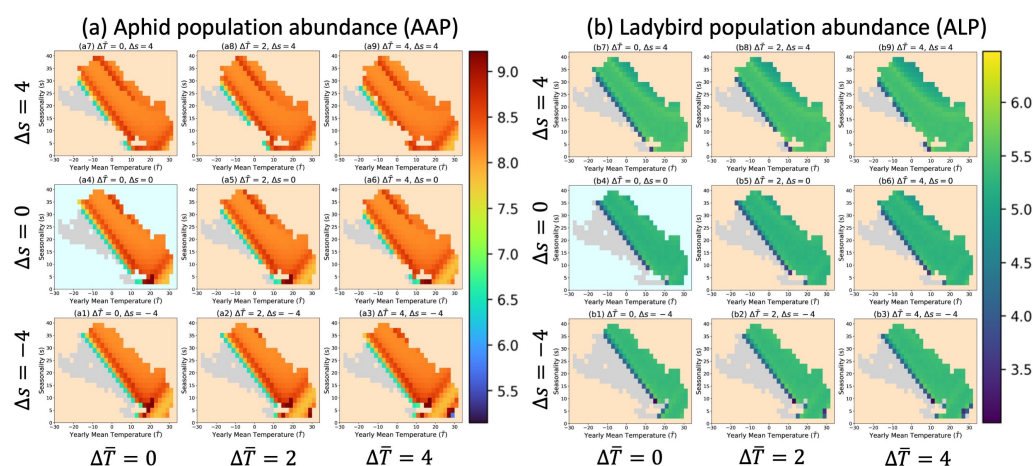

Figure 8: Heatmaps in parameter spaces for aphid and ladybird population abundance under different climate scenarios (*AL5: predators are less cold tolerant than the prey, B-Class*). Colored region represents the global combinations for mean temperature and seasonality. The left nine heatmaps (a) represent the patterns for aphid abundance. The right nine heatmaps (b) represent the patterns for ladybird abundance. The points with light grey color indicate that climates are unsuitable for the prey or predator. The heatmap with light blue background represents the abundance pattern under current climate, the rest heatmaps with light orange backgrounds represent the abundance patterns under different future climates.

*Predators are less heat tolerant (AL6)*. The patterns for aphid abundance (Fig. 9a) are *C-Class*, which are similar to the base case condition (Fig. 7) but differ in regions 3 and 4. Aphids are much more abundant in the  $C_3$ -

region here than in the previous cases we examined. With warming climate, aphid abundance is greater for the warmest and least seasonal climates ( $A_4$ -region). This occurs because under these conditions ‘more constantly hot’ climate limits the development of ladybirds when predators are less heat tolerant, allowing aphid populations to grow larger.

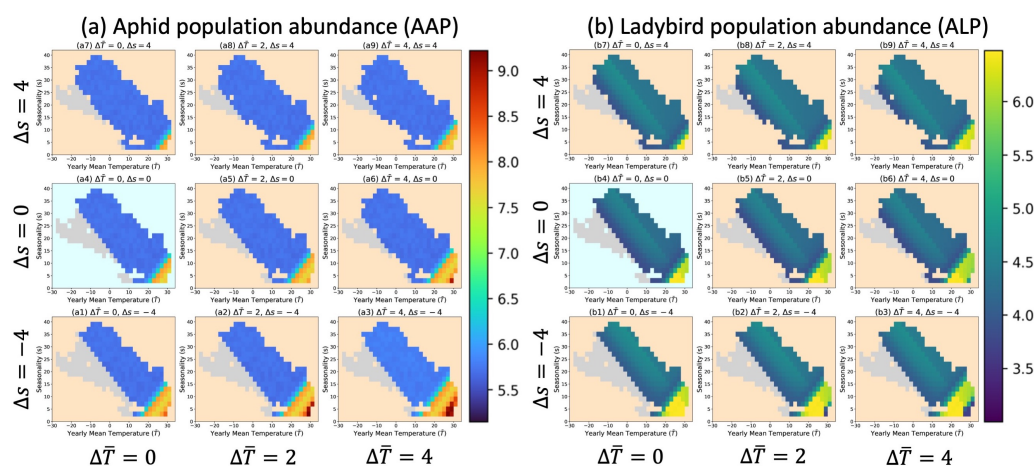

Figure 9: Heatmaps in parameter spaces for aphid and ladybird population abundance under different climate scenarios ( $AL6$ : predators are less heat tolerant,  $C$ -Class). Colored region represents the global combinations for mean temperature and seasonality. The left nine heatmaps (a) represent the patterns for aphid abundance. The right nine heatmaps (b) represent the patterns for ladybird abundance. The points with light grey color indicate that climates are unsuitable for the prey or predator. The heatmap with light blue background represents the abundance pattern under current climate, the rest heatmaps with light orange backgrounds represent the abundance patterns under different future climates.

$Predators are both less cold and less heat tolerant$  ( $AL7$ ). [Fig. S10](#) is quite similar to  $AL5$  and is  $B$ -Class. Again, as in  $AL2$ , aphid abundance is quite high compared to when predators have a wider thermal niche than the prey.

534 Notice that the *A*-Class results change to *B*-Class when the predators are  
535 less cold tolerant than the prey (AL5 and AL7).

### 536 3.5. Identical thermal breadths

537 *Predators are more cold and less heat tolerant than the prey* (AL8). Fig.  
538 S11a is a *C*-Class result. In general, the prey abundance is lower than AL7  
539 and the base case but a bit higher than AL2. This matches our intuition  
540 in that the lower heat tolerance of the predators offsets, in part, more cold  
541 tolerance in decreasing prey abundance.

542 *Predators are less cold and more heat tolerant than the prey* (AL9). Just as  
543 in the other pairs of species where the predator is less cold tolerant than the  
544 prey (AL5 and AL7), Fig. S12a shows *B*-Class results. These results are also  
545 similar in magnitude to those cases.

### 546 3.6. Summary for all species pairs

547 Comparing all the heatmaps for each pair (Fig. 10), cold tolerance of  
548 predators is much more influential than heat tolerance on prey abundance.  
549 Furthermore, when the predator has a wider thermal tolerance niche, it is  
550 most able to control the prey population; in contrast, when the predator  
551 has a narrower thermal tolerance niche, it poorly controls the prey popula-  
552 tion. Overall, the mismatch of minimum and maximum thermal tolerances  
553 between predators and prey matters in determining species' response to the  
554 changing climate, even when both species have identical thermal tolerance  
555 breadth.

556 In response to climate change, all scenarios have a coherent response in  
557 the light grey region ( $A_1$ ,  $B_1$  and  $C_1$  regions), i.e., a warmer more seasonal

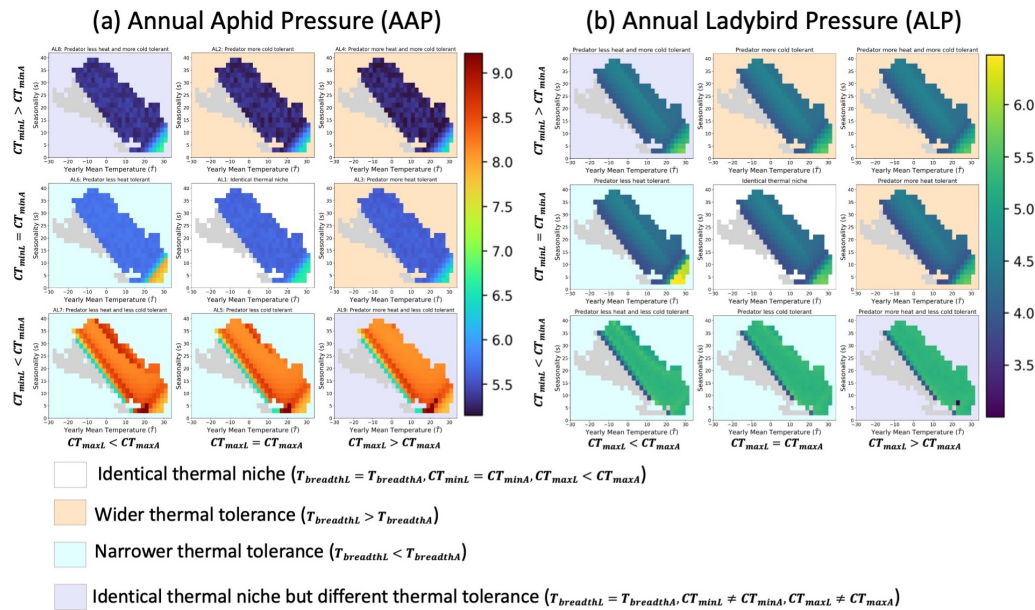

Figure 10: Heatmaps for nine thermal tolerance mismatching predator-prey pairs under current climate. (a1)–(a9) and (b1)–(b9) represent the heatmaps for aphid and ladybird population abundance, respectively. The heatmap with white background represent the species pairs with identical thermal niche, three heatmaps with light orange background represent the species pairs that predators have wider thermal tolerances, the three heatmaps with light blue background represent the species pairs that predators have narrower thermal tolerances, and the two heatmaps with light purple.

558 future climate will lead more regions becoming suitable for these species  
 559 to survive. In the regions with warmer less seasonal climates ( $A_3$  and  $B_3$   
 560 regions), predators and prey with different thermal tolerances will respond  
 561 to climate change differently. Except for the three pairs when predators  
 562 are less cold tolerant than the prey (AL5, AL7, AL9), prey will be more  
 563 abundant when future climates become warmer and less seasonal in  $A_3$  region.  
 564 However, prey will be less abundant in  $B_3$  region under such a climate change

565 scenario. Notably, there is a trade-off between warmer climate and more  
566 seasonal climate, which makes it difficult to predict the effect of a more  
567 seasonal climate on species abundance.

## 568 4. Discussion

569 It is traditional to construct dynamic stage-structured models of insect  
570 populations. To date, a large variety of such models have been developed for  
571 studying predator-prey interactions (see e.g., [Kettle and Nutter, 2015](#); [Kha-](#)  
572 [janchi, 2014](#); [Wang and Zou, 2017](#); [Lu et al., 2017](#); [Xia et al., 2018](#); [Mortoja](#)  
573 [et al., 2018](#)) as well as herbivore-plant interactions (see e.g., [Newman et al.,](#)  
574 [2003](#); [Newman, 2004, 2005, 2006](#); [Thornley and Newman, 2022](#)). These stud-  
575 ies have a variety of aims such as model improvement, biological control and  
576 in-season forecasting. For example, [Kettle and Nutter \(2015\)](#) present an R-  
577 package, stagePop, which can be used to simulate the deterministic dynamics  
578 of stage-structured populations that are involved in species interactions, en-  
579 vironmental change and so on. They have taken the Beddington–DeAngelis-  
580 type functional response ([Beddington, 1975](#); [DeAngelis et al., 1975](#)), which  
581 admits rich and biologically meaningful dynamics to study predator-prey in-  
582 teractions. [Xia et al. \(2018\)](#) developed a detailed process-based simulation  
583 model which includes interactions and is affected by temperature and host  
584 growth for the biological control of the cotton aphid. All of these studies pro-  
585 vide insights into predator-prey interactions. Here, we sought to understand  
586 how thermal tolerance mismatches affect predator-prey interactions under  
587 climate change.

588 The use of stage-structured models to study the impacts of climatic

change in combination with thermal performance are few. Skirvin et al. (1997) modified their earlier model of the population dynamics of *Sitobion avenae* to incorporate a ladybird beetle predator *Coccinella septempunctata*, and then predicted the likely effects of climatic change on their interactions. They found that coccinellids are most effective at reducing aphid abundance in relatively hot summers. Hoover and Newman (2004) developed a mechanistic model of a tri-trophic interaction between grass, cereal aphids (*Rhopalosiphum padi*) and their parasitoids (*Aphidius rhopalosiphi*) and examined the interacting effects under climate change. Their model predicted that parasitoids do not fundamentally alter the aphid response to climate change. Although these studies have a similar focus to our study, they are specific to particular pairs of interacting species, and neither considered the heterogeneity of interacting species' thermal tolerance mismatch.

Thermal performance mismatches among interacting species are common in nature (Agosta et al., 2018). Laboratory studies on the thermal limits of *Aphis gossypii* and its predator *Harmonia dimidiata*, showed that the aphid has a higher  $CT_{max}$  than the ladybird (Yu et al., 2013). Hughes et al. (2010) found that the parasitoid *Lysiphlebus testaceipes* is more cold and more heat tolerant than its host, the black bean aphid (*Aphis fabae*). Agosta et al. (2018) found that the caterpillar host *Manduca sexta* had a higher  $CT_{max}$  ( $\approx 4^{\circ}\text{C}$ ) than the parasitic wasp, *Cotesia congregata*, and the hyperparasitic wasp, *Conura* sp., had a higher  $CT_{max}$  ( $\approx 6^{\circ}\text{C}$ ) than its host, *C. congregata*. Pintanel et al. (2021) studied a predator-prey system of dragonflies (20 species) and anuran larvae (17 species). Their analyses revealed that predators exhibit higher heat tolerances than prey ( $\approx 4^{\circ}\text{C}$ ) across habitats

and elevations. [Buxton et al. \(2020\)](#) examined the thermal tolerance of three mosquito species and their predators and concluded that the predators had lower  $CT_{min}$  and  $CT_{max}$  than the mosquito prey. These inconsistent thermal tolerance performances among different predator and prey species point to the significance of our generalized approach.

We comprehensively examined the generalized responses of a predator-prey system to climate change by using pairs of interacting species with different thermal tolerances. Our results show prey abundance is affected by the predator's thermal tolerance. When the predators' thermal tolerance is narrower than that of the prey, prey abundance increases, especially when predators are less cold tolerant than the prey. Cold tolerance of the predator is much more influential than their heat tolerance on prey abundance. Poorer cold tolerance doesn't allow the predator to regulate prey growth at the beginning of the growing season. Notably, [Bennett et al. \(2021\)](#) have concluded that cold tolerance has evolved more quickly than heat tolerance in both endotherms and ectotherms, which indicates that the evolutionary adaption of a species' cold tolerance may lead to significant impacts on interacting species. Our results also suggest the importance of integrating evolutionary adaption into the study of species interactions.

We have shown that the outcome of the predator-prey interaction depends on the relationship between the mean annual temperature and the seasonality. Climate change projections indicate warming, to varying degrees, all over the globe, and generally an increase in seasonality, except at high latitudes and altitudes ([Fig. S13](#)). Currently, aphids and ladybirds do well in tropical regions where the mean annual temperature is between the  $CT_{max}$  and



639  $CT_{min}$  values for each species and low seasonality ensure that both species  
 640 spend most or all of the year in temperatures conducive to growth. As cli-  
 641 mate change pushes the mean temperature above the  $CT_{max}$  and increases  
 642 seasonality, some or all of the year will become too warm to support pos-  
 643 itive growth rates. Conversely, at high latitudes, the current mean annual  
 644 temperature is below the  $CT_{min}$  values, the low seasonality means that the  
 645 temperature is rarely, if ever, above  $CT_{min}$ . As the climate warms and be-  
 646 comes more seasonal, some portion of the year may become warm enough  
 647 to support positive population growth rates. In the middle latitudes, we see  
 648 both decreases and increases in the amounts of time when the temperature  
 649 is between the  $CT_{max}$  and  $CT_{min}$  values. In the lower middle latitudes the  
 650 increasing temperature and seasonality tend to make too warm parts of the  
 651 year that were previously suitable. The reverse is true for the upper middle  
 652 latitudes where increasing temperature and seasonality tend to make more  
 653 of the year suitable (i.e.,  $< CT_{max}$  and  $> CT_{min}$ ). Our findings are con-  
 654 sistent with latitudinal patterns in [Youngsteadt et al. \(2017\)](#)'s experimental  
 655 study, which shows that species abundance will increase with warming in  
 656 high-latitude taxa, but have heterogeneous responses in mid-latitudes.

657 The lack of evolution in the species' thermal tolerance performances in  
 658 response to climate change is a significant limitation of our study. Predators  
 659 and prey may evolve differently in respond to environmental change, which  
 660 will alter their subsequent interactions ([Grigaltchik et al., 2012](#); [Cheng et al.,](#)  
 661 [2017](#)). The shapes of predator's and prey's thermal performance curves may  
 662 shift in the face of climate change. [Tüzün and Stoks \(2018\)](#) considered six  
 663 scenarios of how an evolutionary shift in the thermal tolerance of one species



may affect the performance of its interacting species and concluded that evolution of thermal tolerance curves may strongly impact the predicted outcome of biotic interactions under climate warming. However, they did not support their analysis with general theory nor systematically predict the outcomes. In [Tüzün and Stoks \(2018\)](#)'s study, the three scenarios that involve a horizontal shift in thermal tolerance are analogous to the comparisons in our study between AL1 and AL9, AL2 and AL3, and AL6 and AL5. Our modelling leads to the conclusion that for both prey and predator abundances will increase if the predator's thermal performance curve shifts to the right horizontally, which supports [Tüzün and Stoks' \(2018\)](#) conclusion about the importance of considering the evolution of species thermal tolerances. The abiotic environment and species interactions may drive the natural selection of species' thermal limits in the long term. For example, when predators have narrower thermal niches, it eventually leads to higher abundances for both prey and predators, but it is unclear how thermal performance differences lead to differences in individual fitness. The evolution of thermal performance of interacting species to climate change adds uncertainties to the prediction of species' abundances. Prey may respond faster to climate change than predators due to a shorter generation time but the long periods during which aphids reproduce asexually may mean that they evolve more slowly than their predators. We will examine the influence of evolution on predator and prey thermal tolerance in a future paper.

Although the current model might be seen as 'biologically detailed', there are still some limitations due to the trade-off between simplicity and realism ([Levins, 1966](#)). We made assumptions and model choices for simplicity

and tractability. For example, we only modeled growing season abundances and assumed the aphid and ladybird population are closed (i.e., no immigration and emigration), as well as ignored other sources of species' extrinsic mortality rate. Furthermore, prey abundances are highly dependent on the initial prey-predator ratio ( $R_{initial}$ ), which is a key factor for biological control, and also supported by Latham and Mills' (2010) and Xia et al.'s (2018) studies. Nevertheless, when predators are less cold tolerant than the prey, the predators are not able to regulate the prey population at the beginning of the growing season because they develop slower and later than the prey. Predators were not able to regulate the prey population no matter how low we set the  $R_{initial}$ . Although the patterns of species abundance are different with different  $R_{initial}$  (Fig. S14), general conclusions stay the same no matter what the early season densities for predators and prey are.

## 5. Conclusions

We used the biologically detailed stage-structured population dynamic model present in this study to summarize the generalized response of a predator-prey system with different thermal tolerances to climate change. Notwithstanding the limitations and uncertainties, our study identify three common patterns of species abundance across the feasible parameter space that relate to the type of thermal tolerance mismatches. Our results indicate that thermal tolerance mismatch between predators and prey affects their abundance, as well as their response to climate change. The main findings of this study suggest the dominant role of cold tolerance in affecting prey abundance, especially under climate change scenarios. Our study highlights

713 the significance of understanding how thermal tolerance mismatches affect  
714 species interactions.

## 715 **6. Author contribution**

716 **Xuezhen Ge:** Conceptualization, Methodology, Project administration,  
717 Software, Visualization, Writing - original draft, Writing - review and editing.  
718 **Cortland K. Griswold:** Conceptualization, Funding acquisition, Method-  
719 ology, Writing - review and editing. **Jonathan A. Newman:** Conceptual-  
720 ization, Funding acquisition, Methodology, Writing - review and editing.

## 721 **7. Acknowledgements**

722 We thanks Sharcnet and Compute Canada for providing computational  
723 support. This work was conducted on the traditional territory of the Neutral,  
724 Anishnaabe and Haudenosaunee peoples. It is important to acknowledge  
725 these peoples as the traditional stewards of the land and doing so reminds  
726 us of our on-going responsibilities toward reconciliation.

## 727 **8. Funding**

728 This work was supported by Canadian Natural Science and Engineering  
729 Research Council, Canadian Foundation for Innovation and Ontario Trillium  
730 Scholarship.

## 731 **References**

732 Agarwala, B.K., Singh, T.K., Lokeshwari, R.K., Sharmila, M., 2009. Func-  
733 tional response and reproductive attributes of the aphidophagous ladybird

734 beetle, *Harmonia dimidiata* (Fabricius) in oak trees of sericultural impor-  
735 tance. Journal of Asia-Pacific Entomology 12, 179–182.

736 Agosta, S.J., Joshi, K.A., Kester, K.M., 2018. Upper thermal limits dif-  
737 fer among and within component species in a tritrophic host-parasitoid-  
738 hyperparasitoid system. PLoS One 13, e0198803.

739 Aldyhim, Y., Khalil, A., 1993. Influence of temperature and daylength on  
740 population development of aphid gossypii on cucurbita pepo. Entomologia  
741 Experimentalis et Applicata 67, 167–172.

742 Alexander, J.M., Diez, J.M., Levine, J.M., 2015. Novel competitors shape  
743 species' responses to climate change. Nature 525, 515–518.

744 Amundrud, S.L., Srivastava, D.S., 2020. Thermal tolerances and species in-  
745 teractions determine the elevational distributions of insects. Global Ecol-  
746 ogy and Biogeography 29, 1315–1327.

747 Beddington, J.R., 1975. Mutual interference between parasites or predators  
748 and its effect on searching efficiency. The Journal of Animal Ecology ,  
749 331–340.

750 Bennett, J.M., Sunday, J., Calosi, P., Villalobos, F., Martínez, B., Molina-  
751 Venegas, R., Araújo, M.B., Algar, A.C., Clusella-Trullas, S., Hawkins,  
752 B.A., et al., 2021. The evolution of critical thermal limits of life on earth.  
753 Nature communications 12, 1–9.

754 Bianchi, F.J., Booij, C., Tschardtke, T., 2006. Sustainable pest regulation in  
755 agricultural landscapes: a review on landscape composition, biodiversity

756 and natural pest control. *Proceedings of the Royal Society B: Biological*  
757 *Sciences* 273, 1715–1727.

758 Birkett, A.J., Blackburn, G.A., Menéndez, R., 2018. Linking species thermal  
759 tolerance to elevational range shifts in upland dung beetles. *Ecography* 41,  
760 1510–1519.

761 Blois, J.L., Zarnetske, P.L., Fitzpatrick, M.C., Finnegan, S., 2013. Climate  
762 change and the past, present, and future of biotic interactions. *Science*  
763 341, 499–504.

764 Boukal, D.S., Bideault, A., Carreira, B.M., Sentis, A., 2019. Species interac-  
765 tions under climate change: connecting kinetic effects of temperature on  
766 individuals to community dynamics. *Current opinion in insect science* 35,  
767 88–95.

768 Brown, M., 2004. Role of aphid predator guild in controlling spirea aphid  
769 populations on apple in West Virginia, USA. *Biological Control* 29, 189–  
770 198.

771 Buxton, M., Nyamukondiwa, C., Dalu, T., Cuthbert, R.N., Wasserman, R.J.,  
772 2020. Implications of increasing temperature stress for predatory biocon-  
773 trol of vector mosquitoes. *Parasites & Vectors* 13, 1–11.

774 Chen, I.C., Hill, J.K., Ohlemüller, R., Roy, D.B., Thomas, C.D., 2011. Rapid  
775 range shifts of species associated with high levels of climate warming. *Sci-*  
776 *ence* 333, 1024–1026.

777 Cheng, B.S., Komoroske, L.M., Grosholz, E.D., 2017. Trophic sensitivity of

778     invasive predator and native prey interactions: integrating environmental  
779     context and climate change. *Functional Ecology* 31, 642–652.

780     Damien, M., Tougeron, K., 2019. Prey–predator phenological mismatch un-  
781     der climate change. *Current opinion in insect science* 35, 60–68.

782     DeAngelis, D.L., Goldstein, R., O'Neill, R.V., 1975. A model for tropic  
783     interaction. *Ecology* 56, 881–892.

784     Dedryver, C.A., Le Ralec, A., Fabre, F., 2010. The conflicting relationships  
785     between aphids and men: a review of aphid damage and control strategies.  
786     *Comptes Rendus Biologies* 333, 539–553.

787     Farhadi, R., Allahyari, H., Chi, H., 2011. Life table and predation capacity of  
788     *Hippodamia variegata* (Coleoptera: Coccinellidae) feeding on *Aphis fabae*  
789     (Hemiptera: Aphididae). *Biological Control* 59, 83–89.

790     Gilman, S.E., 2017. Predicting indirect effects of predator–prey interactions.  
791     *Integrative and comparative biology* 57, 148–158.

792     Glen, A.S., Dickman, C.R., 2014. The importance of predators. *Carnivores of*  
793     *Australia: past, present and future*. Australia: CSIRO Publishing , 1–12.

794     Grigaltchik, V.S., Ward, A.J., Seebacher, F., 2012. Thermal acclimation of  
795     interactions: differential responses to temperature change alter predator–  
796     prey relationship. *Proceedings of the Royal Society B: Biological Sciences*  
797     279, 4058–4064.

798     Hersbach, H., Bell, B., Berrisford, P., Biavati, G. and Horányi, A.,  
799     Muñoz Sabater, J., Nicolas, J., Peubey, C., Radu, R., Rozum, I., et al.,

2018. ERA5 hourly data on single levels from 1979 to present. <https://cds.climate.copernicus.eu/cdsapp#!/dataset/reanalysis-era5-single-levels?tab=overview>. doi:10.24381/cds.adbb2d47. date accessed: December 14, 2019.

Holling, C.S., 1959. Some characteristics of simple types of predation and parasitism. Canadian entomologist 91, 385–398.

Hoover, J.K., Newman, J.A., 2004. Tritrophic interactions in the context of climate change: a model of grasses, cereal aphids and their parasitoids. Global Change Biology 10, 1197–1208.

Hughes, G.E., Owen, E., Sterk, G., Bale, J.S., 2010. Thermal activity thresholds of the parasitic wasp *lysiphlebus testaceipes* and its aphid prey: implications for the efficacy of biological control. Physiological Entomology 35, 373–378.

Kersting, U., Satar, S., Uygun, N., 1999. Effect of temperature on development rate and fecundity of apterous aphids *gossypii glover* (hom., aphididae) reared on *gossypium hirsutum* l. Journal of Applied Entomology 123, 23–27.

Kettle, H., Nutter, D., 2015. stagepop: Modelling stage-structured populations in R. Methods in Ecology and Evolution 6, 1484–1490.

Khajanchi, S., 2014. Dynamic behavior of a Beddington–DeAngelis type stage structured predator–prey model. Applied Mathematics and Computation 244, 344–360.

- 822 Khan, J., Haq, E.U., Mehmood, T., Blouch, A., Rafi, M.A., Fateh, J., 2016a.  
823 Effect of temperature on the biology and predatory potential, of *Harmonia*  
824 *Dimidiata* (Fab.) (Coleoptera: Coccinellidae) feeding on *Myzus Persicae*  
825 (Sulzer) (Hemiptera: Aphididae) aphid. International Journal of Environ-  
826 ment, Agriculture and Biotechnology 1, 342–349.
- 827 Khan, J., Haq, E.U., Rehman, A., 2015. Effect of temperature on the biology  
828 of *Harmonia dimidiata* Fab. (Coleoptera: Coccinellidae) reared on *Sciza-*  
829 *phus graminum* (Rond.) aphid. Journal of Biodiversity and Environmental  
830 Sciences 7, 42–49.
- 831 Khan, J., Haq, E.U., Saljoki, A.U.R., Rehman, A., 2016b. Effect of tempera-  
832 ture on biological attributes and predatory potential of *Harmonia dimidi-*  
833 *ata* (Fab.)(Coleoptera: Coccinellidae) fed on *Rhopalosiphum padi* aphid.  
834 Journal of Entomology and Zoology Studies 4, 1016–1022.
- 835 Latham, D.R., Mills, N.J., 2010. Quantifying aphid predation: the mealy  
836 plum aphid hyalopterus pruni in california as a case study. Journal of  
837 Applied Ecology 47, 200–208.
- 838 Levins, R., 1966. The strategy of model building in population biology.  
839 American scientist 54, 421–431.
- 840 Lu, Y., Pawelek, K.A., Liu, S., 2017. A stage-structured predator-prey model  
841 with predation over juvenile prey. Applied Mathematics and Computation  
842 297, 115–130.
- 843 Machekano, H., Mvumi, B.M., Nyamukondiwa, C., 2018. Loss of coevolved



844 basal and plastic responses to temperature may underlie trophic level host-  
845 parasitoid interactions under global change. *Biological Control* 118, 44–54.

846 Mortoja, S.G., Panja, P., Mondal, S.K., 2018. Dynamics of a predator-prey  
847 model with stage-structure on both species and anti-predator behavior.  
848 *Informatics in medicine unlocked* 10, 50–57.

849 Mou, D.F., Lee, C.C., Smith, C., Chi, H., 2015. Using viable eggs to ac-  
850 curately determine the demographic and predation potential of *harmonia*  
851 *dimidiata* (c oleoptera: C occinellidae). *Journal of applied entomology*  
852 139, 579–591.

853 Newman, J., 2005. Climate change and the fate of cereal aphids in Southern  
854 Britain. *Global Change Biology* 11, 940–944.

855 Newman, J., Gibson, D., Parsons, A., Thornley, J., 2003. How predictable  
856 are aphid population responses to elevated co<sub>2</sub>? *Journal of Animal Ecology*  
857 72, 556–566.

858 Newman, J.A., 2004. Climate change and cereal aphids: the relative effects  
859 of increasing co<sub>2</sub> and temperature on aphid population dynamics. *Global*  
860 *Change Biology* 10, 5–15.

861 Newman, J.A., 2006. Using the output from global circulation models to pre-  
862 dict changes in the distribution and abundance of cereal aphids in Canada:  
863 a mechanistic modeling approach. *Global Change Biology* 12, 1634–1642.

864 Ng, J.C., Perry, K.L., 2004. Transmission of plant viruses by aphid vectors.  
865 *Molecular Plant Pathology* 5, 505–511.

- 866 Pintanel, P., Tejedo, M., Salinas-Ivanenko, S., Jervis, P., Merino-Viteri, A.,  
867 2021. Predators like it hot: Thermal mismatch in a predator–prey system  
868 across an elevational tropical gradient. *Journal of Animal Ecology* 90,  
869 1985–1995.
- 870 Satar, S., Kersting, U., Uygun, N., 2005. Effect of temperature on develop-  
871 ment and fecundity of *Aphis gossypii* Glover (homoptera: Aphididae) on  
872 cucumber. *Journal of Pest Science* 78, 133–137.
- 873 Schmitz, O.J., Barton, B.T., 2014. Climate change effects on behavioral  
874 and physiological ecology of predator–prey interactions: implications for  
875 conservation biological control. *Biological Control* 75, 87–96.
- 876 Schulzweida, U., 2019. CDO user guide (Version 1.9.8). [https://doi.org/](https://doi.org/10.5281/zenodo.3539275)  
877 [10.5281/zenodo.3539275](https://doi.org/10.5281/zenodo.3539275). doi:10.5281/zenodo.3539275. date accessed:  
878 October 31, 2019.
- 879 Sharma, P., Verma, S., Chandel, R., Shah, M., Gavkare, O., 2017. Functional  
880 response of *Harmonia dimidiata* (Fab.) to melon aphid, *Aphis gossypii*  
881 Glover under laboratory conditions. *Phytoparasitica* 45, 373–379.
- 882 Singh, R., Singh, K., 2015. Life history parameters of *Aphis gossypii* Glover  
883 (homoptera: Aphididae) reared on three vegetable crops. *International*  
884 *Journal of Research Studies in Zoology* 1, 1–9.
- 885 Skirvin, D., Perry, J., Harrington, R., 1997. The effect of climate change on  
886 an aphid–coccinellid interaction. *Global change biology* 3, 1–11.
- 887 Slosser, J., Parajulee, M., Hendrix, D., Henneberry, T., Pinchak, W., 2004.

888 Cotton aphid (Homoptera: Aphididae) abundance in relation to cotton  
889 leaf sugars. *Environmental Entomology* 33, 690–699.

890 Sunday, J.M., Bates, A.E., Dulvy, N.K., 2012. Thermal tolerance and the  
891 global redistribution of animals. *Nature Climate Change* 2, 686–690.

892 Thornley, J.H., France, J., 2007. *Mathematical models in agriculture: quan-*  
893 *titative methods for the plant, animal and ecological sciences.* Cabi.

894 Thornley, J.H., Newman, J.A., 2022. Climate sensitivity of the complex  
895 dynamics of the green spruce aphid - spruce plantation interactions: insight  
896 from a new mechanistic model. *PLoS One*, in press.

897 Tüzün, N., Stoks, R., 2018. Evolution of geographic variation in thermal  
898 performance curves in the face of climate change and implications for biotic  
899 interactions. *Current opinion in insect science* 29, 78–84.

900 Van Steenis, M., El-Khawass, K., 1995. Life history of *aphis gossypii* on cu-  
901 cumber: influence of temperature, host plant and parasitism. *Entomologia*  
902 *Experimentalis et Applicata* 76, 121–131.

903 Visser, M.E., Gienapp, P., 2019. Evolutionary and demographic consequences  
904 of phenological mismatches. *Nature Ecology & Evolution* 3, 879–885.

905 Wang, X., Zou, X., 2017. Modeling the fear effect in predator–prey inter-  
906 actions with adaptive avoidance of predators. *Bulletin of mathematical*  
907 *biology* 79, 1325–1359.

908 Xia, J., van, der Werf, W., Rabbinge, R., 1999. Influence of temperature

- 909 on bionomics of cotton aphid, *aphis gossypii*, on cotton. *Entomologia*  
910 *Experimentalis et Applicata* 90, 25–35.
- 911 Xia, J., Wang, J., Cui, J., Leffelaar, P., Rabbinge, R., Van Der Werf, W.,  
912 2018. Development of a stage-structured process-based predator–prey  
913 model to analyse biological control of cotton aphid, *aphis gossypii*, by  
914 the sevenspot ladybeetle, *coccinella septempunctata*, in cotton. *Ecological*  
915 *complexity* 33, 11–30.
- 916 Youngsteadt, E., Ernst, A.F., Dunn, R.R., Frank, S.D., 2017. Responses  
917 of arthropod populations to warming depend on latitude: evidence from  
918 urban heat islands. *Global change biology* 23, 1436–1447.
- 919 Yu, J., Chi, H., Chen, B.H., 2013. Comparison of the life tables and preda-  
920 tion rates of *Harmonia dimidiata* (F.) (Coleoptera: Coccinellidae) fed on  
921 *Aphis gossypii* Glover (Hemiptera: Aphididae) at different temperatures.  
922 *Biological Control* 64, 1–9.
- 923 Zamani, A., Talebi, A., Fathipour, Y., Baniamari, V., 2006. Effect of tem-  
924 perature on biology and population growth parameters of *Aphis gossypii*  
925 Glover (Hom., Aphididae) on greenhouse cucumber. *Journal of Applied*  
926 *Entomology* 130, 453–460.
- 927 Zarghami, S., Mossadegh, M.S., Kocheili, F., Allahyari, H., Rasekh, A., 2016.  
928 Functional responses of *Nephus arcuatus* Kapur (Coleoptera: Coccinel-  
929 lidae), the most important predator of spherical mealybug *Nipaecoccus*  
930 *viridis* (Newstead). *Psyche* 2016, 1–9.
